# Supplementary material for: Functionalization of an Alginate-Based Material by Oxidation and Reductive Amination
Source: MDPI journal article supplement (doi:10.3390/polym13020255), 2021-01-14
Supplement: s1 [file s1]

## Supporting information

### Functionalization of an alginate-based Material by Oxidation and Reductive Amination

Ronny G. Huamani-Palomino<sup>1,\*</sup>, Bryan M. Córdova<sup>1</sup>, E. Renzo Pichilingue L.<sup>2</sup>, Tiago Venâncio<sup>3</sup>, and Ana C. Valderrama<sup>1,\*</sup>

<sup>1</sup> Laboratory Investigation of Biopolymers and Metallopharmaceuticals (LIBIMET), Faculty of Sciences, Chemistry Department, National University of Engineering. Av. Túpac Amaru 210, 15333, Lima 25, Peru; bcordovav@uni.pe

<sup>2</sup> National University of Engineering Av. Túpac Amaru 210, 15333, Lima 25, Peru; epichilinguel@uni.pe

<sup>3</sup> Laboratório de Ressonância Magnética Nuclear, Departamento de Química, Universidade Federal de São Carlos, São Carlos, São Paulo CP 676, 13565-905, Brazil; venancio@ufscar.br

\* Correspondence: rohuamanip@uni.pe (R.G.H.); ana.valderrama.n@uni.edu.pe (A.C.V.)

The molecular weight of commercial sodium alginate was evaluated by Size-exclusion chromatography (SEC) with online multi-angle static laser light scattering (MALLS), which were performed at ambient temperature on an HPLC system consisting of a solvent reservoir, on-line degasser, HPLC isocratic pump, automatic sample injector, pre-column, and a G6000PW main column. The column outlet was connected to a Dawn HELEOS-II multiangle laser light scattering photometer (Wyatt, U.S.A.) ( $\lambda_0 = 663.8$  nm) followed by Shodex RI-501 refractive index detector. The eluent was 0.15 mol L<sup>-1</sup> NaNO<sub>3</sub>, 0.01 mol L<sup>-1</sup> EDTA (pH = 6.0) and the flow rate was 0.5 mL min<sup>-1</sup>. Samples (1 mg mL<sup>-1</sup>) were filtered (pore size 0.45  $\mu$ m) before injection and each sample were analyzed twice with injection volume 50 and 100  $\mu$ L. Data were collected and processed (with  $dn/dc = 0.150$  mL g<sup>-1</sup>) using the Astra (v. 7.3.0) software (Wyatt, U.S.A.). The analysis was performed according to the ASTM protocol nr. F2602 – 13.

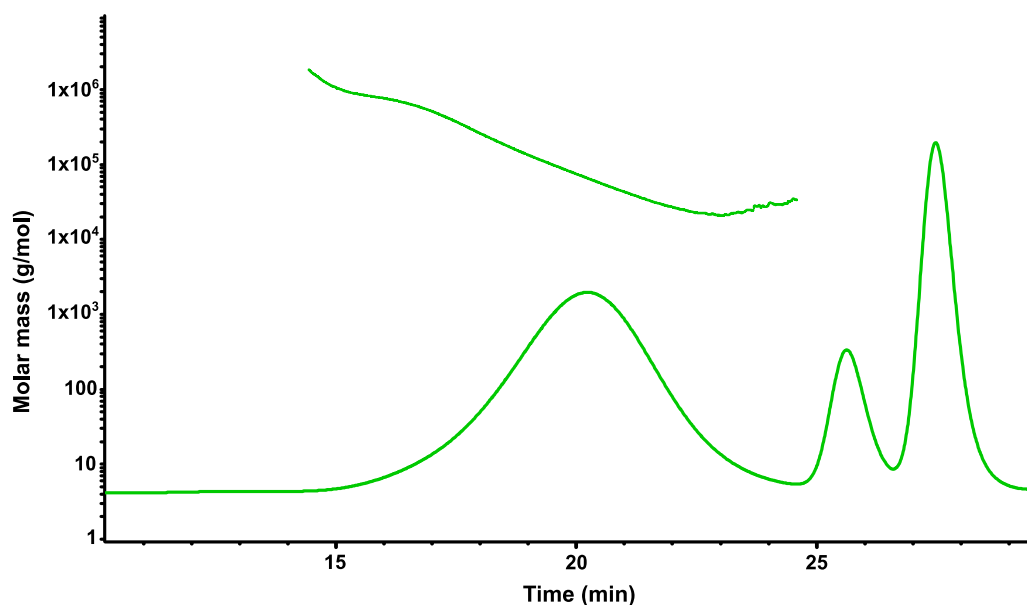

Figure S1. Refractive index chromatogram of commercial sodium alginate used as starting material.

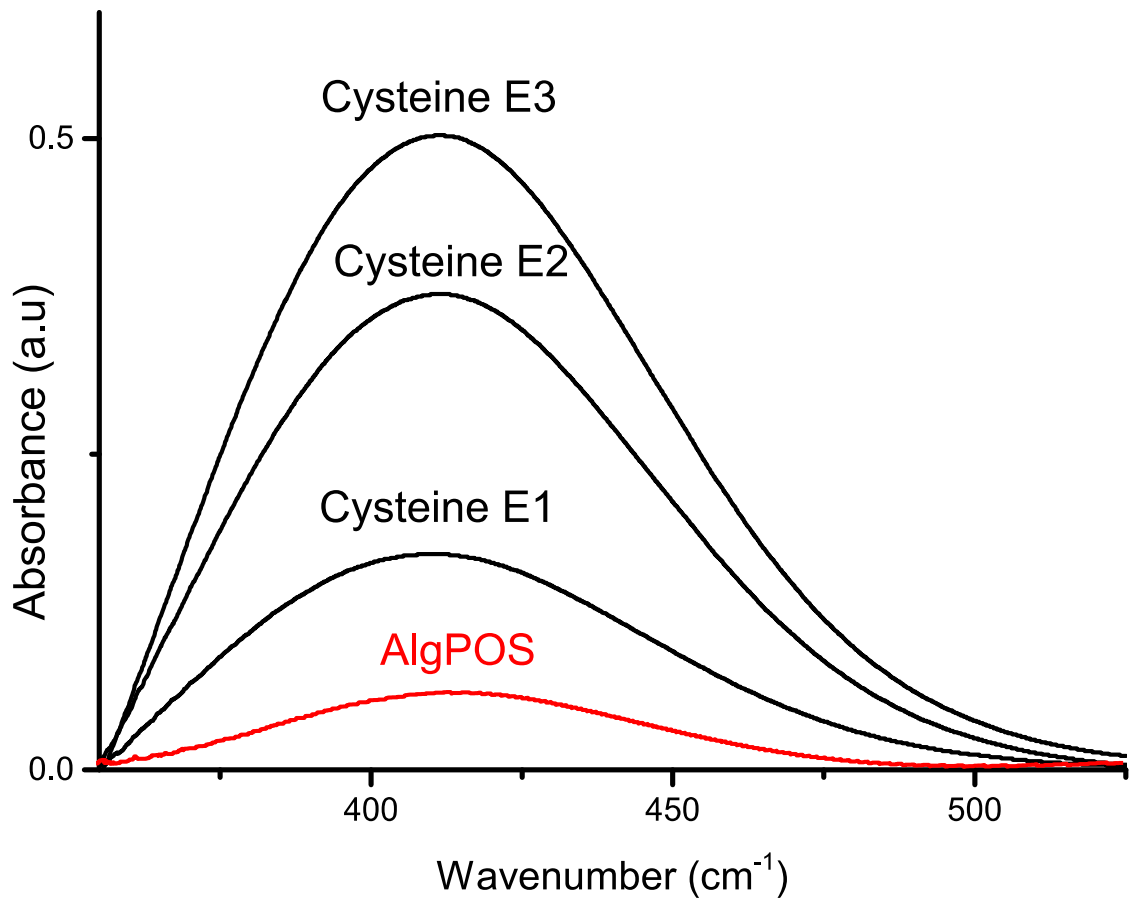

Figure S2. UV-Vis spectra of cysteine standards (E1, E2 and E3) and AlgPOS. Evaluation of thiols group by Ellman’s reaction.

Table S1. Values obtained of commercial sodium alginate by SEC-MALS

| Sample                             | Mn          | Mw           | PI (Mw/Mn) |
|------------------------------------|-------------|--------------|------------|
| Sodium alginate<br>(Sigma Aldrich) | 58.6        | 124.7        | 2.1        |
|                                    | 57.0        | 123.7        | 2.2        |
| <b>Average</b>                     | <b>57.8</b> | <b>124.2</b> | <b>2.1</b> |

Table S2. Values obtained of commercial sodium alginate by <sup>1</sup>H NMR

| Sample                             | F <sub>G</sub> | F <sub>M</sub> | F <sub>GG</sub> | F <sub>GM</sub> | F <sub>MM</sub> | F <sub>GGM</sub> | F <sub>MGM</sub> | F <sub>GGG</sub> | N(G>1) | M/G  |
|------------------------------------|----------------|----------------|-----------------|-----------------|-----------------|------------------|------------------|------------------|--------|------|
| Sodium alginate<br>(Sigma Aldrich) | 0.49           | 0.50           | 0.30            | 0.18            | 0.31            | 0.07             | 0.11             | 0.24             | 5.33   | 1.02 |

Table S3. Values obtained of AlgPOS by UV-Visible.

| Sample      | Absorbance | [C] ( $\mu\text{M}$ ) | V(mL) |
|-------------|------------|-----------------------|-------|
| Cysteine E1 | 0.171      | 24.6                  | 10    |
| Cysteine E2 | 0.377      | 49.2                  | 10    |
| Cysteine E3 | 0.503      | 61.5                  | 10    |
| AlgPOS      | 0.086      | 74.7                  | 200   |
